**Amino acid quality modifies the quantitative availability of protein for reproduction in**

***Drosophila melanogaster***

Authors:

Carolyn Ma, Christen K. Mirth, Matthew D. Hall, Matthew D.W. Piper\*

Address:

School of Biological Sciences, Monash University, Melbourne, Australia

Correspondence:

Matthew Piper: [matthew.piper@monash.edu](mailto:matthew.piper@monash.edu)

**Abstract**

Diet composition, especially the relative abundance of key macronutrients, is well known to affect animal wellbeing by changing reproductive output, metabolism and length of life. However, less attention has been paid to the ways the quality of these nutrients modify these macronutrient interactions. Nutritional Geometry can be used to model the effects of multiple dietary components on life-history traits and to compare these responses when diet quality is varied. Previous studies have shown that dietary protein quality can be increased for egg production in *Drosophila melanogaster* by matching the dietary amino acid proportions to the balance of amino acids used by the sum of proteins in the fly's *in silico* translated exome. Here, we show that dietary protein quality dramatically alters the effect of protein quantity on female reproduction across a broad range of diets varying in both protein and carbohydrate concentrations. These data show that when sources of ingredients vary, their relative value to the consumer can vastly differ and yield very different physiological outcomes. Such variations could be particularly important for meta analyses that look to draw generalisable conclusions from diverse studies.

## 31 Introduction

32

33 To optimise fitness, organisms must consume a sufficient quantity and quality of nutrients  
34 to suit their needs (Hall et al., 2008, Lee et al., 2008, Bong et al., 2014). This is demonstrated  
35 by the dramatic changes in reproductive function seen when flies or rodents are subjected  
36 to food restriction or changes in diet balance, particularly when the relative proportion of  
37 protein to carbohydrates is changed (Widdowson and Cowen, 1972, Good and Tatar, 2001,  
38 Carey et al., 2002, Liang and Zhang, 2006, Lee et al., 2008, Skorupa et al., 2008, Simpson and  
39 Raubenheimer, 2012, Solon-Biet et al., 2015, Camus et al., 2019).

40

41 Food is comprised of dozens of nutrients that interact to modify animal physiology.  
42 Understanding how nutritional interactions affect the consumer is complex but can be  
43 facilitated using a structured approach such as Nutritional Geometry (Raubenheimer and  
44 Simpson, 1997). Nutritional Geometry maps the responses of life history traits to  
45 quantitative variations of two or more macronutrients. This is typically performed by  
46 exposing animals to one of many diets that vary across a range of calorie compositions and  
47 protein to carbohydrate ratios. A nutrient space is defined by axes (generally two) that  
48 represent the quantity of nutrients that an organism has eaten – thus any point in space can  
49 represent the status of an organism according to its nutritional history. By mapping an array  
50 of organisms with different dietary histories into this space, their collective phenotypic  
51 responses can be fitted by an overlaid surface represented by a heat map (z- axis). This  
52 allows for the modelling of the interactive effects of nutrients on phenotypes of interest.  
53 Although conceptually simple, assessing phenotypic responses to nutrition through the  
54 perspective of Nutritional Geometry has revealed new understanding of biology and, in  
55 some cases, has unified apparently conflicting interpretations about the way organisms  
56 respond to diet change (Solon-Biet et al., 2016).

57 Nutritional Geometry experiments have shown that variation in two of the energy-yielding  
58 macronutrients, protein and carbohydrate, affect the expression of many traits. In particular  
59 the lifespan and reproduction of adult fruit flies (*Drosophila melanogaster*) are shaped by

the interactive effects of dietary protein and carbohydrate (Lee et al., 2008, Skorupa et al., 2008, Jensen et al., 2015). In the case of protein, more recent work has shown that the proportion of its constituent amino acids has an important role to play in protein's effects on these traits (Grandison et al., 2009, Piper et al., 2017).

The dietary amino acid requirements of female flies for optimal egg production can be determined from its genome by a process termed exome matching (Piper et al., 2017). To exome match a diet, we *in silico* translate the exome of the consumer, sum the abundance of each amino acid across all proteins, and find the relative proportion of each amino acid. We then use this proportion as the basis for the abundance of each amino acid in the food. By matching the dietary protein quality to the fly exome in this way, we found that for a fixed mass of amino acids, exome matched diets supported higher levels of reproduction than diets that were mismatched (Piper et al., 2017). Together, these data show that dietary amino acid balance is important for determining fitness outcomes.

Although dietary amino acid balance is important, Nutritional Geometry experiments that measure fitness responses to diets invariably treat protein as a single nutrient dimension with a fixed proportion of all 20 amino acids. This is reasonable for experiments in which the protein source is held constant across all diets. However, proteins vary in quality when attained from different sources and, like many natural ingredients, the same type of protein may vary in quality between locations and seasons. Given this, it may be difficult to directly compare the effects of consumed "protein" on a trait when the data are from different studies. To examine these effects, we designed an experiment using a Nutritional Geometry design to assess how changing dietary protein quality modifies the interactive effects of the amino acid (protein; P) to carbohydrate (C) ratio on egg laying. We designed an array of diets varying in P:C ratio for each of two different amino acid (protein) mixtures. These mixtures varied in the relative proportion of each amino acid, as well as the identity of the most limiting essential amino acid and the degree to which it is predicted to be limiting.

## Method

89

90 *Animal husbandry*

91

92 We used the Dahomey outbred population of *Drosophila melanogaster* (Mair et al., 2005).  
 93 Routine rearing and maintenance of flies employed the techniques and sugar/yeast (SY) diet  
 94 described in Bass et al. (2007). All flies were maintained at 25°C with a 12 hr: 12 hr light dark  
 95 photoperiod. For the experiment, a population of flies was age synchronised as in Piper and  
 96 Partridge (2016).

97

98 *Experimental diets*

99

100 Completely defined synthetic (holidic) diets were made according to Piper et al. (2014), in  
 101 which free amino acids are used to make up protein equivalents. To convert amino acids to  
 102 protein equivalents, we used the molar quantities of nitrogen and the assumption that N  
 103 makes up 16% of whole proteins (Sosulski and Imafidon, 1990). Two protein qualities,  
 104 defined by their amino acid ratios, were compared: FLYaa (matched to the amino acid ratio  
 105 of the exome of adult flies), and MMaa (a ratio considered mis-matched to the flies'  
 106 requirements). The relative proportion of each amino acid within each amino acid ratios are  
 107 displayed in Table 1. From this point on, the concentration of total amino acids is referred to  
 108 as protein (P), calculated according to the above method.

109

110 For both amino acid ratios, we generated diets that were one of five P:C ratios (1:3.6, 1:1.8,  
 111 1:1.1, 1:0.8, 1:0.6) and one of four caloric densities (66.8 kcal/L, 111.3 kcal/L, 155.8 kcal/L,  
 112 200.3 kcal/L), where dietary energy densities were estimated by calculation, using a value of  
 113 4 kcal/g for both protein and carbohydrates (Table 2). Thus, 20 diets were employed to test  
 114 the effect on egg laying of each amino acid ratio.

115

116

117

118

**Table 1. The relative proportions of each amino acid in the two amino acid ratios tested, FLYaa and MMaa.**

| Amino acids               |               |   | Ratio |       |
|---------------------------|---------------|---|-------|-------|
|                           |               |   | MMaa  | FLYaa |
| Essential amino acids     | Phenylalanine | F | 0.027 | 0.037 |
|                           | Histidine     | H | 0.022 | 0.026 |
|                           | Isoleucine    | I | 0.077 | 0.052 |
|                           | Lysine        | K | 0.044 | 0.057 |
|                           | Leucine       | L | 0.052 | 0.094 |
|                           | Methionine    | M | 0.018 | 0.025 |
|                           | Arginine      | R | 0.016 | 0.057 |
|                           | Threonine     | T | 0.057 | 0.056 |
|                           | Valine        | V | 0.081 | 0.062 |
|                           | Tryptophan    | W | 0.008 | 0.010 |
| Non-essential amino acids | Alanine       | A | 0.133 | 0.075 |
|                           | Cysteine      | C | 0.001 | 0.017 |
|                           | Aspartate     | D | 0.043 | 0.053 |
|                           | Glutamate     | E | 0.058 | 0.063 |
|                           | Glycine       | G | 0.144 | 0.062 |
|                           | Asparagine    | N | 0.044 | 0.047 |
|                           | Proline       | P | 0.044 | 0.052 |
|                           | Glutamine     | Q | 0.058 | 0.046 |
|                           | Serine        | S | 0.061 | 0.079 |
|                           | Tyrosine      | Y | 0.013 | 0.031 |

**Table 2.** The equivalent protein: carbohydrate (P:C) ratio, displayed with the nutrient densities.

| P:C equivalent | Sum mass of amino acids (g/L) | Equivalent protein (g/L) | Equivalent carbohydrate (g/L) <sup>1</sup> | Estimated caloric content (kcal/L) |
|----------------|-------------------------------|--------------------------|--------------------------------------------|------------------------------------|
| 1:3.6          | 3.92                          | 3.54                     | 12.77                                      | 66.8                               |
| 1:3.6          | 6.53                          | 5.91                     | 21.29                                      | 111.3                              |
| 1:3.6          | 9.14                          | 8.27                     | 29.81                                      | 155.8                              |
| 1:3.6          | 11.75                         | 10.63                    | 38.32                                      | 200.3                              |
| 1:1.8          | 6.42                          | 5.81                     | 10.27                                      | 66.8                               |
| 1:1.8          | 10.7                          | 9.68                     | 17.12                                      | 111.3                              |
| 1:1.8          | 14.98                         | 13.55                    | 23.97                                      | 155.8                              |
| 1:1.8          | 19.26                         | 17.42                    | 30.82                                      | 200.3                              |
| 1:1.1          | 8.32                          | 7.52                     | 8.38                                       | 66.8                               |
| 1:1.1          | 13.86                         | 12.54                    | 13.96                                      | 111.3                              |
| 1:1.1          | 19.41                         | 17.55                    | 19.54                                      | 155.8                              |
| 1:1.1          | 24.95                         | 22.57                    | 25.13                                      | 200.3                              |
| 1:0.8          | 9.57                          | 8.66                     | 7.12                                       | 66.8                               |
| 1:0.8          | 15.95                         | 14.43                    | 11.87                                      | 111.3                              |
| 1:0.8          | 22.33                         | 20.20                    | 16.62                                      | 155.8                              |
| 1:0.8          | 28.71                         | 25.97                    | 21.37                                      | 200.3                              |
| 1:0.6          | 10.99                         | 9.94                     | 5.70                                       | 66.8                               |
| 1:0.6          | 18.32                         | 16.57                    | 9.50                                       | 111.3                              |
| 1:0.6          | 25.64                         | 23.20                    | 13.30                                      | 155.8                              |
| 1:0.6          | 32.97                         | 29.65                    | 17.10                                      | 200.3                              |

### *Experimental set-up*

Flies were housed in devices called dFlats, which are made up of a block of Perspex with 12-wells drilled into them, such that the drilled wells have a volume the same as standard fly vials (FS32, Pathtech) and their arrangement is such that the 12 openings match the position of wells in a 12-well plate (based on the design: <https://www.flidea.tech/projects>). 3ml food was dispensed into each of the wells in a 12-well plate. Each dFlat well contained 10 mated female flies and we maintained one dFlat for each of the 20 holidic experimental diets (12 replicate wells x 10 flies = 120 flies per diet).

<sup>1</sup> Carbohydrate is added to the diet as sucrose.

## 149 *Reproduction experiment*

150  
151 Once a week for 3 weeks the number of eggs laid on the media over an 18-hour period was  
152 counted and recorded. Measuring reproductive output during the first weeks of egg laying  
153 has shown to be representative of life-long reproduction of flies (Chapman and Partridge,  
154 1996, Muller et al., 2001). For each well in each dFlat device, the number of eggs laid per  
155 female on each experimental day (day 8, 15 and 22) was calculated. The value for eggs laid  
156 by an average female in a well was summed across days and used to calculate the  
157 cumulative egg laying of an average female in a food type. We call this value the index of  
158 reproduction. The number of eggs in each well and food type was obtained by taking images  
159 using a web camera attached to a stereomicroscope. The images were then processed in  
160 Image J to acquire the correct image size, which were then automatically counted in the  
161 software called QuantiFly (Waithe et al., 2015).

## 163 *Statistical analyses*

164  
165 All analyses were conducted using R (version 3.3.0, available from [http://www.R-](http://www.R-project.org/)  
166 [project.org/](http://www.R-project.org/)). To analyse the relationship between our index of reproduction and the  
167 protein (P) and carbohydrate (C) concentration, we generated separate response surfaces  
168 for each of the two amino acid ratios. Each surface was estimated using multivariate  
169 second-order polynomial regression, whereby the linear, quadratic and cross-product terms  
170 from this model capture the linear and non-linear effects of P and C concentration on fly  
171 reproduction. For each amino acid ratio, the minimum adequate model for each linear  
172 model was found by determining if eliminating the most complex parameter significantly  
173 reduced the model fit. We visualised the response surface of each amino acid ratio using  
174 predictions derived from thin-plate splines from the fields package (see  
175 [www.github.com/NCAR/Fields](http://www.github.com/NCAR/Fields)) and subsequently visualised via the ggplot package.

## Results

To capture the effects of differences in protein quality on egg production of *D. melanogaster*, we made media containing two different amino acid ratios, one known to be mismatched to fly requirements for egg laying (MMaa) and the other known to be matched precisely to the fly's exome (FLYaa) (Piper et al., 2017). For each amino acid ratio, an array of 5 different P:C ratios, each at 4 different nutrient densities, was tested. Thin-plate splines were used to visualise egg laying response surfaces of flies maintained on the different diets (Figure 1A and 1B).

Across all food types, flies maintained on the MMaa diets laid fewer eggs per female per day than those on the FLYaa diets (MMaa diet,  $24.07 \pm 1.42$ ; FLYaa  $31.69 \pm 2.14$ ; one-way ANOVA:  $F_{1,33} = 11.205$ ,  $p < 0.001$ ). For flies on both the MMaa and the FLYaa diet, there was a significant effect of the linear component of protein, such that egg laying increased with increasing dietary protein concentration (Table 2.). For FLYaa, we also found the quadratic term for protein concentration to be significant, which is shown in the plots as the peak of egg laying in FLYaa occurred at intermediate concentrations of protein (P:C of 1:0.8) (Figure 1a; Table 2). From this point, egg laying dropped away as the protein concentration either increased or decreased (Figure 1a; Table 2). In contrast, peak egg laying on MMaa occurred on the food with the highest nutrient density with P:C of 1:0.6. There was no detectable effect of carbohydrate concentration on egg production across foods of both amino acid ratio and there was also no significant interaction between carbohydrate and protein concentration detected (Table 2). These results show that for the range of diets we tested, protein was the principle determinant of egg production, and that per gram of amino acids supplied, FLYaa supported higher levels of egg laying than MMaa.



**Table 2.** Egg production on each amino acid ratio (FLYaa and MMaa) was modelled using linear predictors for protein (P) and carbohydrate (C) and their interaction (P x C). Because the data appear non-linear, we also assessed the quadratic terms of protein ( $P^2$ ) and carbohydrates ( $C^2$ ). Minimum adequate models are reported.  $\beta$ , indicates the the slope estimate for each variable, and; SE, the standard error. Highlighted bold signifies significance, \*  $p < 0.05$ ; \*\*  $p < 0.001$ .

| Amino acid ratio |         | P             | C      | $P^2$            | $C^2$            | P x C  |
|------------------|---------|---------------|--------|------------------|------------------|--------|
| FLYaa            | $\beta$ | <b>3.250</b>  | -0.206 | <b>-0.127</b>    | -0.007           | 0.042  |
|                  | SE      | <b>1.393</b>  | 1.203  | <b>0.037</b>     | 0.024            | 0.050  |
|                  | t-value | <b>2.332*</b> | -0.171 | <b>-3.464**</b>  | -0.301           | 0.846  |
| MMaa             | $\beta$ | <b>1.186</b>  | 0.129  | N/A <sup>2</sup> | N/A <sup>2</sup> | -0.032 |
|                  | SE      | <b>0.502</b>  | 0.341  |                  |                  | 0.027  |
|                  | t-value | <b>2.365*</b> | 0.377  |                  |                  | -1.184 |

<sup>2 2</sup> N/A, not applicable. For the MMaa model,  $P^2$  and  $C^2$  were not significant in the model and so were removed during model reduction.

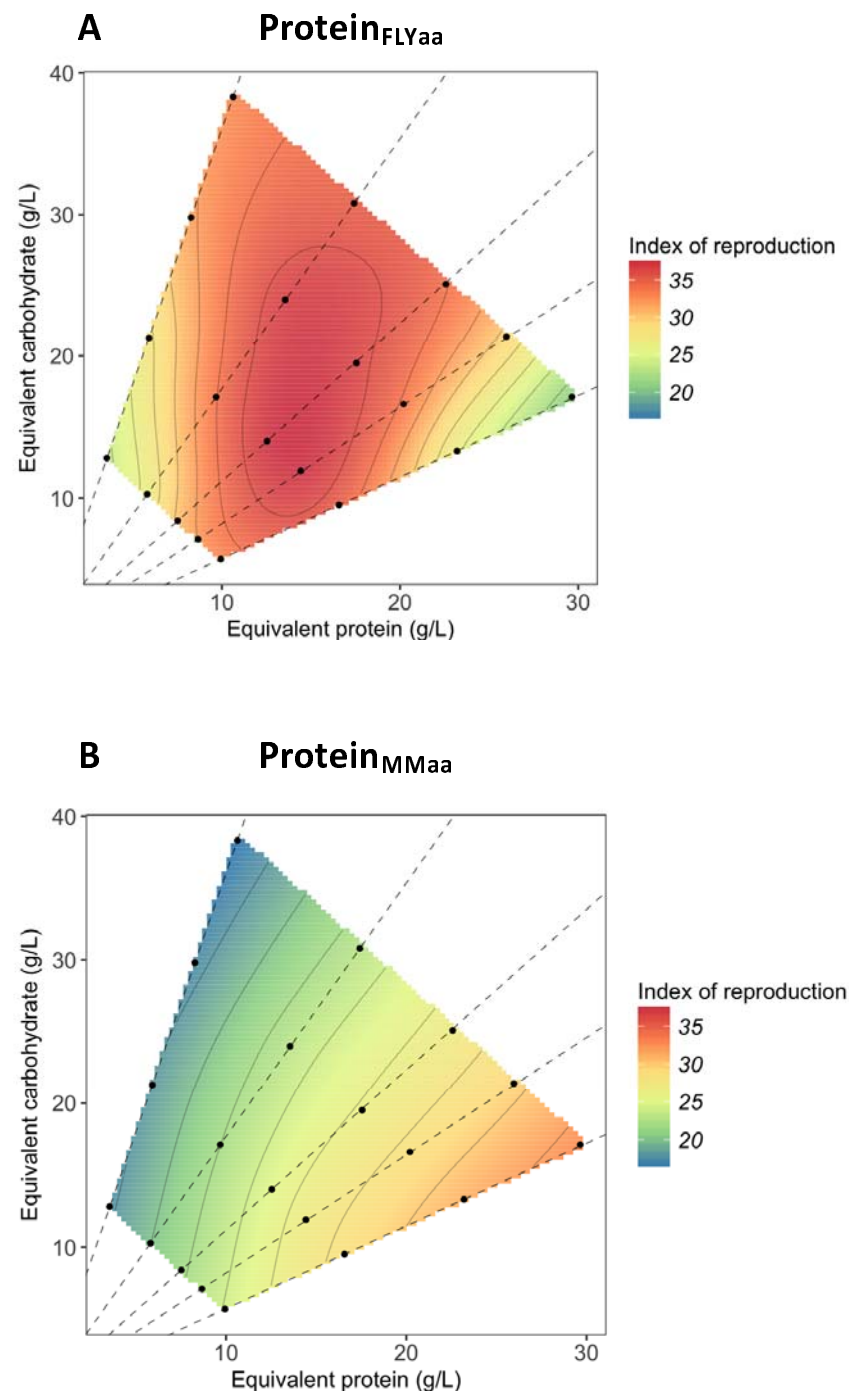

**Figure 1.** Egg laying varies with the quantity of carbohydrates and the quantity and quality of protein. Flies were maintained on diets containing amino acids in the ratio of either **(A)** FLYaa (fly exome matched amino acid ratio) or **(B)** MMaa (mis-matched amino acid ratio). The black dots represent the individual 20 diets from which the index of reproduction was assessed and the dashed lines represent nutritional rails of fixed P:C.

## Discussion

The ratio of dietary protein to carbohydrate in the diet has an important role in determining reproduction in *Drosophila melanogaster*: higher density diets with greater P:C ratios support higher female egg laying (Mair et al., 2005, Lee et al., 2008, Skorupa et al., 2008, Jensen et al., 2015). Here we show that varying the protein quality of a diet can also dramatically alter its bioavailability for reproduction of female *D. melanogaster*. These data demonstrate how diverse outcomes in important fitness traits can occur when the quality of food ingredients vary.

Protein is often a limiting component of the diet for terrestrial animals (White, 1993), which means that changes in the quality of dietary protein consumed should have observable effects on fitness for many animals in diverse settings. Indeed, supplementing the diet of wild cotton rats and cottontail rabbits with an essential amino acid (methionine) can improve their reproductive success and increase population size (Lochmiller et al., 1995, Webb et al., 2005), while maintaining blue tits on a diet supplemented with amino acids matched for egg protein formation laid more eggs per clutch than those that received a mismatched balance of amino acids (Ramsay and Houston, 1998). Similarly, female copepods fed on a diet containing essential amino acid profiles that were closely matched to female body composition had higher reproductive success (Guisande et al., 1999) and, supplementing amino acids in the diet of livestock, like boars and chickens, can increase reproductive output and yield more lean muscle (Dong et al., 2016, Cerrate et al., 2019). Finally, recent work in the lab on flies and mice has shown that differences in protein quality, specified at the level of essential amino acid balance, can have dramatic effects on animal reproduction and feeding behaviour (Leitao-Goncalves et al., 2017, Piper et al., 2017, Solon-Biet et al., 2019). Thus, changing the quality of dietary protein by altering the proportion of amino acids can have important effects on fitness traits of both laboratory-reared and wild animals.

In our experimental diets, we found large changes in egg output because the amino acid ratio was altered so that the bioavailability of the nitrogen source varied 2.5-fold (Piper et al., 2017). In other words, the level of FLYaa that was required to support maximal egg output was ~15g/L, which is 2.5-times less than the amount of MMaa (37 g/L) that would be required to achieve the same output. Thus, smaller amounts of high-quality food are required for optimal egg laying. With defined diets, this large difference in protein quality is easily generated because each amino acid can be independently manipulated over a wide range of concentrations. Interestingly, similarly large differences in the relative abundance of amino acids (i.e. changes in protein quality) can also be found between natural proteins in whole foods. For example, when comparing the average amino acid profiles across food groups published in an FAO report (Food Policy and Food Science Service, 1970), we found that for a fixed quantity of protein, the average amino acid proportions in meat represent ~2-fold higher quality than the average legume-based protein. This is because the limiting essential amino acid in legume protein, methionine, is more deficient compared to the limiting essential amino acid, leucine, in meat protein. Thus, we predict that using different dietary components to feed animals or humans will result in dramatic changes to physiology and behaviour. Furthermore, without explicit knowledge of the source of ingredients and their quality, it will be difficult to extract generalisable conclusions from meta-analyses that incorporate diverse studies.

It is important to note that protein is not the only compound axis in most published Nutritional Geometry experiments. For example, the other energy yielding macronutrients, carbohydrate and fat, also exist as a diverse array of molecules in food. This can be even more complicated since in typical studies with flies, sucrose and yeast are often used the sources of carbon and protein, respectively (Bass et al., 2007, Min et al., 2007, Lee et al., 2008), and yeast contains various types of carbohydrates as well as other nutritional components, such as sterols, nucleic acids, vitamins, and minerals (Lange and Heijnen, 2001). In addition to our findings about protein quality, other work has shown that varying the identity of the carbohydrate component of the diet from sucrose to fructose can alter fly physiology (Lushchak et al., 2014). Thus, it will be important in future studies to

understand the relative contribution of different carbohydrates, fats and other nutrients in modifying fitness traits.

## Conclusion

By showing that the precise amino acid composition of dietary protein is key for dictating female fecundity, we demonstrate the need for more information to be provided when labelling composite nutritional axes in Nutritional Geometry experiments. In particular, protein should be labelled with its source to indicate its quality – a metric that would be further improved if the most limiting essential amino acid were identified by referencing the dietary protein amino acid profile to the *in silico* translated exome of the consumer (Piper et al., 2017). We anticipate this will facilitate the comparability of data between studies.

# Acknowledgements

We thank Amy Dedman, Sasha Pollock and Sarah Gough for technical assistance and Scott Pletcher for help with design and development of the hotel chambers. We also acknowledge many fruitful discussions at the Nutritional Homeostasis workshops in Bonn.

## **References:**

- BASS, T., GRANDISON, R., WONG, R., MARTINEZ, P., PARTRIDGE, L. & PIPER, M. D. 2007. Optimization of Dietary Restriction Protocols in Drosophila Europe PMC Funders Group. *J Gerontol A Biol Sci Med Sci*, 62, 1071-1081.
- BONG, L. J., NEOH, K. B., LEE, C. Y. & JAAL, Z. 2014. Effect of diet quality on survival and reproduction of adult *Paederus fuscipes* (Coleoptera: Staphylinidae). *J Med Entomol*, 51, 752-9.
- CAMUS, M. F., PIPER, M. D. & REUTER, M. 2019. Sex-specific transcriptomic responses to changes in the nutritional environment. *Elife*, 8.
- CAREY, J. R., LIEDO, P., HARSHMAN, L., ZHANG, Y., MULLER, H. G., PARTRIDGE, L. & WANG, J. L. 2002. Life history response of Mediterranean fruit flies to dietary restriction. *Aging Cell*, 1, 140-8.
- CERRATE, S., HALLEY, J. T., CORZO, A. & FANCHER, B. I. 2019. Effect of dietary amino acid density on broiler breeder reproductive performance. *Poult Sci*, 98, 2072-2079.
- CHAPMAN, T. & PARTRIDGE, L. 1996. Female fitness in *Drosophila melanogaster*: an interaction between the effect of nutrition and of encounter rate with males. *Proc Biol Sci*, 263, 755-9.
- DONG, H. J., WU, D., XU, S. Y., LI, Q., FANG, Z. F., CHE, L. Q., WU, C. M., XU, X. Y. & LIN, Y. 2016. Effect of dietary supplementation with amino acids on boar sperm quality and fertility. *Anim Reprod Sci*, 172, 182-9.
- FOOD POLICY AND FOOD SCIENCE SERVICE, N. D., FAO. 1970. *Amino-acid content of foods and biological data on proteins*. [Online]. Food Policy and Food Science Service, Nutrition Division. Available: <http://www.fao.org/3/AC854T/AC854T00.htm#TOC> [Accessed].
- GOOD, T. P. & TATAR, M. 2001. Age-specific mortality and reproduction respond to adult dietary restriction in *Drosophila melanogaster*. *J Insect Physiol*, 47, 1467-1473.
- GRANDISON, R. C., PIPER, M. D. & PARTRIDGE, L. 2009. Amino-acid imbalance explains extension of lifespan by dietary restriction in *Drosophila*. *Nature*, 462, 1061-4.
- GUISANDE, C., MANEIRO, I. & RIVEIRO, I. 1999. Homeostasis in the essential amino acid composition of the marine copepod *Euterpina acutifrons*. *ASLO*, 44, 691-696.

- 356 HALL, M. D., BUSSIERE, L. F. & BROOKS, R. 2008. The effect of diet quality and wing morph  
357 on male and female reproductive investment in a nuptial feeding ground cricket.  
358 *PLoS One*, 3, e3437.
- 359 JENSEN, K., MCCLURE, C., PRIEST, N. K. & HUNT, J. 2015. Sex-specific effects of protein and  
360 carbohydrate intake on reproduction but not lifespan in *Drosophila melanogaster*.  
361 *Aging Cell*, 14, 605-15.
- 362 LANGE, H. C. & HEIJNEN, J. J. 2001. Statistical reconciliation of the elemental and molecular  
363 biomass composition of *Saccharomyces cerevisiae*. *Biotechnol Bioeng*, 75, 334-44.
- 364 LEE, K. P., SIMPSON, S. J., CLISSOLD, F. J., BROOKS, R., BALLARD, J. W., TAYLOR, P. W.,  
365 SORAN, N. & RAUBENHEIMER, D. 2008. Lifespan and reproduction in *Drosophila*:  
366 New insights from nutritional geometry. *Proc Natl Acad Sci U S A*, 105, 2498-503.
- 367 LEITAO-GONCALVES, R., CARVALHO-SANTOS, Z., FRANCISCO, A. P., FIOREZE, G. T., ANJOS,  
368 M., BALTAZAR, C., ELIAS, A. P., ITSKOV, P. M., PIPER, M. D. W. & RIBEIRO, C. 2017.  
369 Commensal bacteria and essential amino acids control food choice behavior and  
370 reproduction. *PLoS Biol*, 15, e2000862.
- 371 LIANG, H. & ZHANG, Z. 2006. Food restriction affects reproduction and survival of F1 and F2  
372 offspring of Rat-like hamster (*Cricetus triton*). *Physiol Behav*, 87, 607-13.
- 373 LOCHMILLER, R. L., PEITZ, D. G., LESLIE, D. M., JR. & ENGLE, D. M. 1995. Habitat-Induced  
374 Changes in Essential Amino-Acid Nutrition in Populations of Eastern Cottontails.  
375 *Journal of Mammalogy*, 76, 1164-1177.
- 376 LUSHCHAK, O. V., GOSPODARYOV, D. V., ROVENKO, B. M., YURKEVYCH, I. S., PERKHULYN, N.  
377 V. & LUSHCHAK, V. I. 2014. Specific dietary carbohydrates differentially influence the  
378 life span and fecundity of *Drosophila melanogaster*. *J Gerontol A Biol Sci Med Sci*, 69,  
379 3-12.
- 380 MAIR, W., PIPER, M. D. & PARTRIDGE, L. 2005. Calories do not explain extension of life span  
381 by dietary restriction in *Drosophila*. *PLoS Biol*, 3, e223.
- 382 MIN, K. J., FLATT, T., KULAOTS, I. & TATAR, M. 2007. Counting calories in *Drosophila* diet  
383 restriction. *Exp Gerontol*, 42, 247-51.
- 384 MULLER, H. G., CAREY, J. R., WU, D., LIEDO, P. & VAUPEL, J. W. 2001. Reproductive potential  
385 predicts longevity of female Mediterranean fruitflies. *Proc Biol Sci*, 268, 445-50.
- 386 PIPER, M. D., BLANC, E., LEITAO-GONCALVES, R., YANG, M., HE, X., LINFORD, N. J.,  
387 HODDINOTT, M. P., HOPFEN, C., SOULTOUKIS, G. A., NIEMEYER, C., KERR, F.,  
388 PLETCHER, S. D., RIBEIRO, C. & PARTRIDGE, L. 2014. A holidic medium for *Drosophila*  
389 *melanogaster*. *Nat Methods*, 11, 100-5.
- 390 PIPER, M. D. & PARTRIDGE, L. 2016. Protocols to Study Aging in *Drosophila*. *Methods Mol*  
391 *Biol*, 1478, 291-302.
- 392 PIPER, M. D. W., SOULTOUKIS, G. A., BLANC, E., MESAROS, A., HERBERT, S. L., JURICIC, P.,  
393 HE, X., ATANASSOV, I., SALMONOWICZ, H., YANG, M., SIMPSON, S. J., RIBEIRO, C. &  
394 PARTRIDGE, L. 2017. Matching Dietary Amino Acid Balance to the In Silico-Translated  
395 Exome Optimizes Growth and Reproduction without Cost to Lifespan. *Cell Metab*,  
396 25, 1206.
- 397 RAMSAY, S. L. & HOUSTON, D. C. 1998. The effect of dietary amino acid composition on egg  
398 production in blue tits. *Proceedings of the Royal Society of London. Series B:*  
399 *Biological Sciences*, 265, 1401-1405.

400 RAUBENHEIMER, D. & SIMPSON, S. J. 1997. Integrative models of nutrient balancing:  
401 application to insects and vertebrates. *Nutr Res Rev*, 10, 151-79.

402 SIMPSON, S. & RAUBENHEIMER, D. 2012. *The Nature of Nutrition: A Unifying Framework*  
403 *from Animal Adaptation to Human Obesity.*, Princeton University Press.

404 SKORUPA, D. A., DERVISEFENDIC, A., ZWIENER, J. & PLETCHER, S. D. 2008. Dietary  
405 composition specifies consumption, obesity, and lifespan in *Drosophila*  
406 *melanogaster*. *Aging Cell*, 7, 478-90.

407 SOLON-BIET, S. M., COGGER, V. C., PULPITEL, T., HEBLINSKI, M., WAHL, D., MCMAHON, A. C.,  
408 WARREN, A., DURRANT-WHYTE, J., WALTERS, K. A., KRYCER, J. R., PONTON, F.,  
409 GOKARN, R., WALI, J. A., RUOHONEN, K., CONIGRAVE, A. D., JAMES, D. E.,  
410 RAUBENHEIMER, D., MORRISON, C. D., LE COUTEUR, D. G. & SIMPSON, S. J. 2016.  
411 Defining the Nutritional and Metabolic Context of FGF21 Using the Geometric  
412 Framework. *Cell Metab*, 24, 555-565.

413 SOLON-BIET, S. M., COGGER, V. C., PULPITEL, T., WAHL, D., CLARK, X., BAGLEY, E.,  
414 GREGORIOU, G. C., SENIOR, A. M., WANG, Q. P., BRANDON, A. E., PERKS, R.,  
415 O'SULLIVAN, J., KOAY, Y. C., BELL-ANDERSON, K., KEBEDE, M., YAU, B., ATKINSON, C.,  
416 SVINENG, G., DODGSON, T., WALI, J. A., PIPER, M. D. W., JURICIC, P., PARTRIDGE, L.,  
417 ROSE, A. J., RAUBENHEIMER, D., COONEY, G. J., LE COUTEUR, D. G. & SIMPSON, S. J.  
418 2019. Branched chain amino acids impact health and lifespan indirectly via amino  
419 acid balance and appetite control. *Nat Metab*, 1, 532-545.

420 SOLON-BIET, S. M., WALTERS, K. A., SIMANAINEN, U. K., MCMAHON, A. C., RUOHONEN, K.,  
421 BALLARD, J. W., RAUBENHEIMER, D., HANDELSMAN, D. J., LE COUTEUR, D. G. &  
422 SIMPSON, S. J. 2015. Macronutrient balance, reproductive function, and lifespan in  
423 aging mice. *Proc Natl Acad Sci U S A*, 112, 3481-6.

424 SOSULSKI, F. & IMAFIDON, G. 1990. Amino acid composition and nitrogen-to-protein  
425 conversion factors for animal and plant foods. *Journal of Agricultural and Food*  
426 *Chemistry*, 38, 1351-1356.

427 WAITHE, D., RENNERT, P., BROSTOW, G. & PIPER, M. D. 2015. QuantiFly: Robust Trainable  
428 Software for Automated *Drosophila* Egg Counting. *PLoS One*, 10, e0127659.

429 WEBB, R. E., LESLIE, D. M., JR., LOCHMILLER, R. L. & MASTERS, R. E. 2005. Impact of Food  
430 Supplementation and Methionine on High Densities of Cotton Rats: Support of the  
431 Amino-Acid-Quality Hypothesis? *Journal of Mammalogy*, 86, 46-55.

432 WHITE, T. R. C. 1993. *The inadequate environment: nitrogen and the abundance of animals.*,  
433 Springer-Verlag Berlin Heidelberg.

434 WIDDOWSON, E. M. & COWEN, J. 1972. The effect of protein deficiency and calorie  
435 deficiency on the reproduction of rats. *Br J Nutr*, 27, 85-95.

436
